# Supplementary material for: Multifunctional sandwich-structured double-carbon-layer modified SnS nanotubes with high capacity and stability for Li-ion batteries
Source: Royal Society of Chemistry journal article supplement (doi:10.1039/d2ma00017b), 2022-01-01
Supplement: d2ma00017b1.pdf [file d2ma00017b1.pdf]

## Supplementary Information

### **Multifunctional sandwich-structured double-carbon-layer modified SnS nanotubes with high capacity and stability for Li-ion batteries**

Jia Luo<sup>a, b</sup>, Huaiyu Li<sup>a, b</sup>, Guo Yu<sup>a, b</sup>, Wenyuan Xu<sup>a, b</sup>, Hong Yin<sup>a, b, \*</sup>, Zhaohui Hou<sup>a, b</sup>,

\*\*

<sup>a</sup>School of Chemistry and Chemical Engineering, Hunan Institute of Science and Technology, Yueyang, 414006, China

<sup>b</sup>Key Laboratory of Hunan Province for Advanced Carbon-based Functional Materials, Hunan Institute of Science and Technology, Yueyang 414006, China

\*Corresponding Author

E-mail: 2017507027@hust.edu.cn (H. Yin).

\*, \*Corresponding Author

E-mail: zhaohuihou@126.com (Z. Hou).

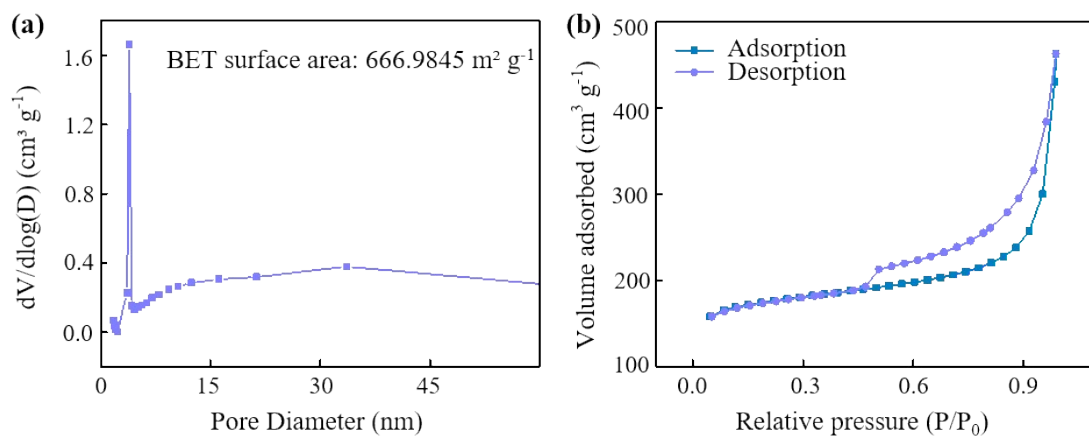

**Figure S1.** Pore size distribution (a) and  $\text{N}_2$  adsorption-desorption isotherms (b) of the as-prepared N-DCSNs.

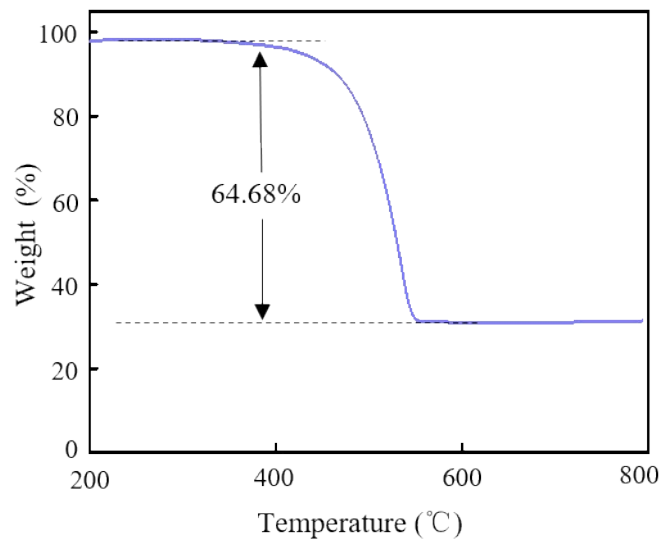

**Figure S2.** TG analysis of N-DCSNs sample at temperatures ranging from 200 to 800 °C in air.

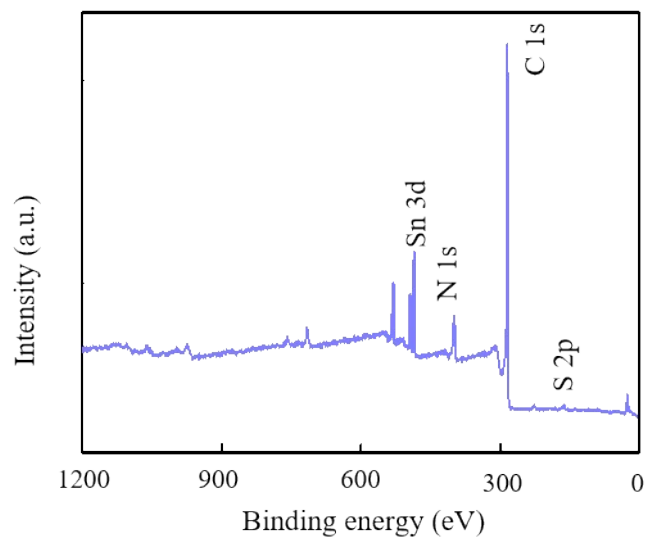

**Figure S3.** XPS spectra of N-DCSNs for all elements.

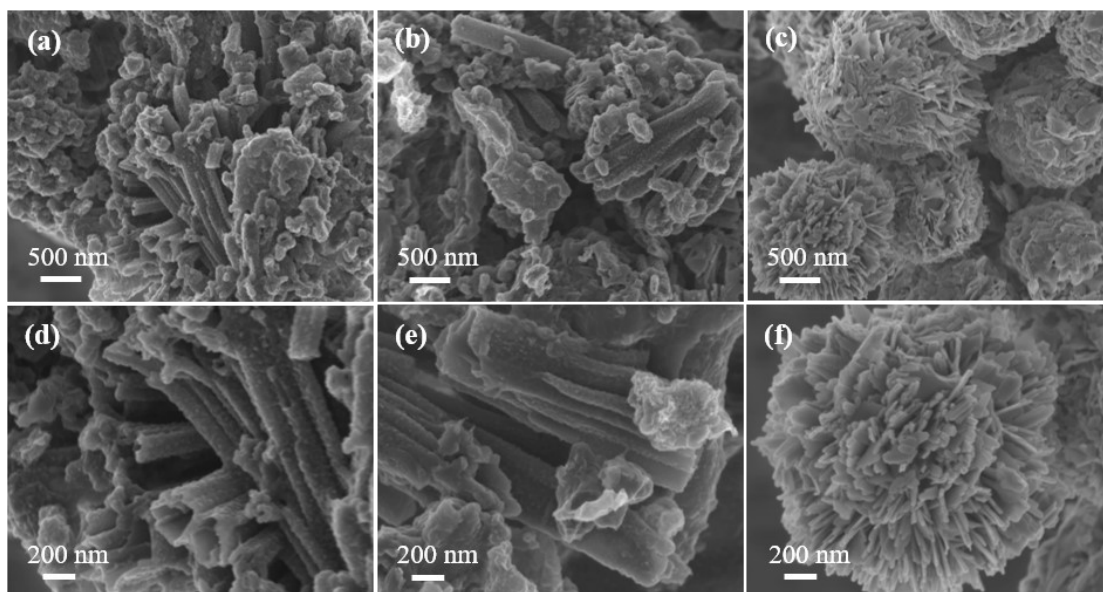

**Figure S4.** SEM images of the N-DCSNs (a, d), the CN/SnS composites (b, e) and the bare SnS (c, f).

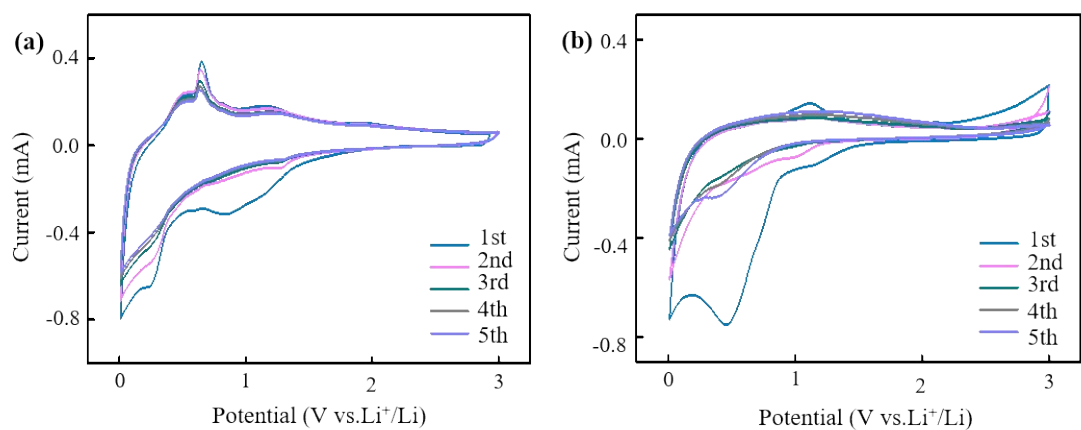

**Figure S5.** Cyclic voltammetry curves of CN/SnS (a) and bare SnS (b) between 0.01 and 3.0 V with a scan rate of 0.5 mV s<sup>-1</sup>.

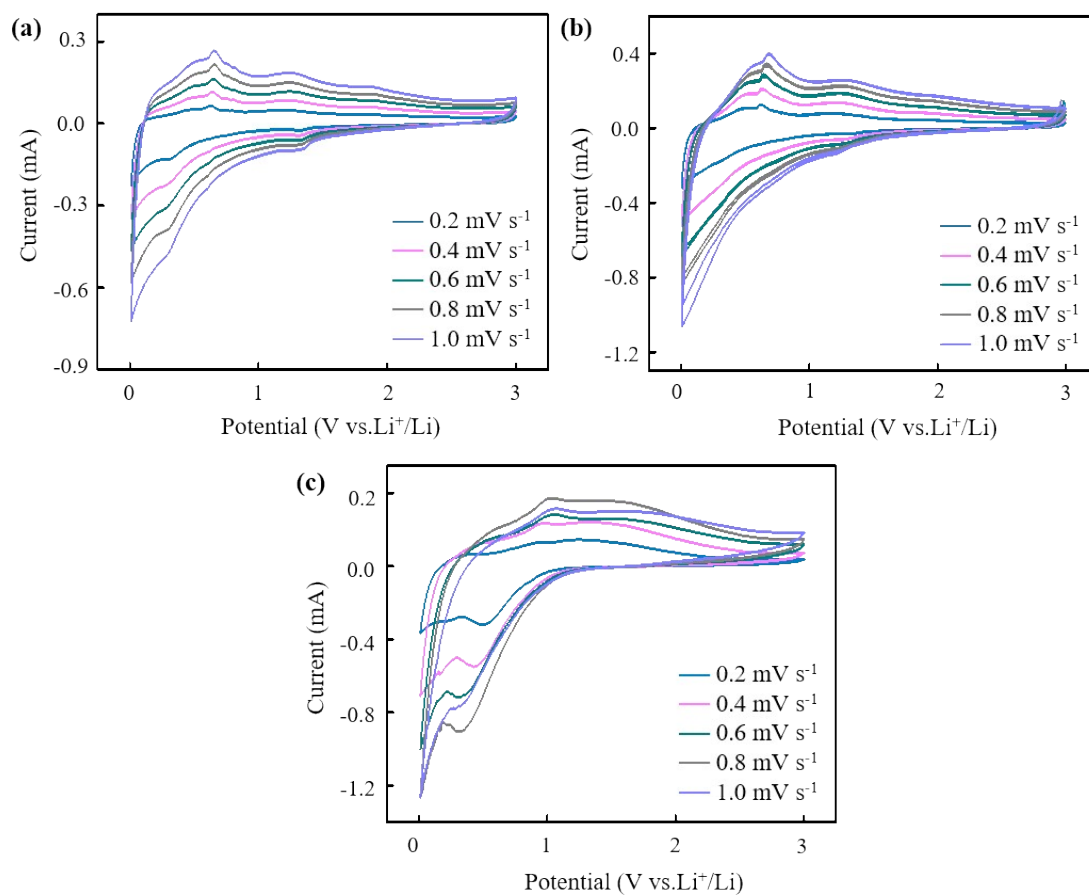

**Figure S6.** Cyclic voltammetry curves of N-DCSNs (a), CN/SnS (b) and bare SnS (c) between 0.01 and 3.0 V with scan rate of 0.2, 0.4, 0.6, 0.8, and 1.0  $\text{mV s}^{-1}$ , respectively.

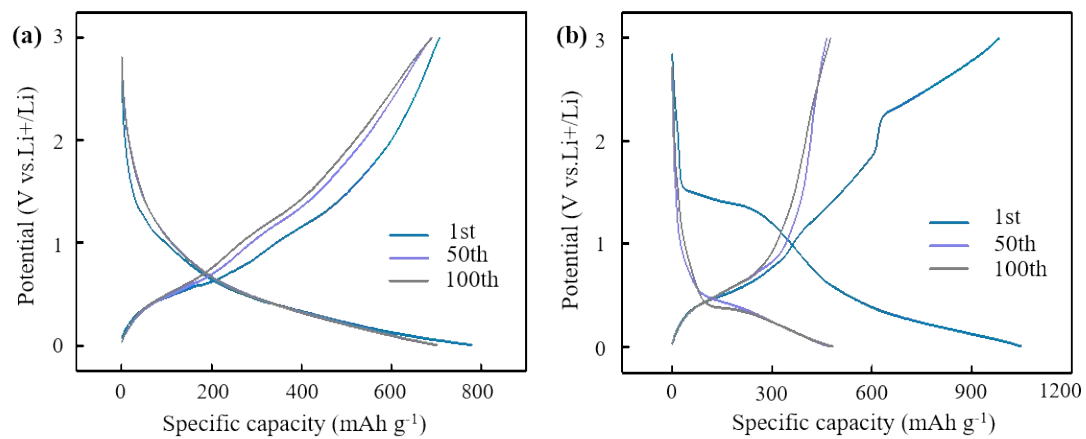

**Figure S7.** Discharge-charge voltage profiles of CN/SnS (a) and bare SnS (b) at a current density of 0.2 A g<sup>-1</sup>, respectively.



**Table S1.** Electrochemical performance of SnS-based anode materials for LIBs.

| Samples                      | Specific capacity<br>(mAh g <sup>-1</sup> ) | Cycles      | Current<br>density (A g <sup>-1</sup> ) | Ref.             |
|------------------------------|---------------------------------------------|-------------|-----------------------------------------|------------------|
| SnS/N-G                      | 1120                                        | 130         | 0.1                                     | 1                |
| SnS@C HSs                    | 532                                         | 100         | 0.1                                     | 2                |
| SnS/N-C particles            | 535                                         | 300         | 1.0                                     | 3                |
| SnS/C nanofibers             | 648                                         | 500         | 0.2                                     | 4                |
| 3D porous SnS/C              | 607                                         | 200         | 1.0                                     | 5                |
| SnS nanoparticles            | 410                                         | 50          | 0.1                                     | 6                |
| SnS nanoflowers              | 600                                         | 30          | 0.05                                    | 7                |
| SnS/C-CP                     | 696                                         | 200         | 0.5                                     | 8                |
| SnS NS/RGO                   | 560                                         | 100         | 0.1                                     | 9                |
| SnS-ZnS@C                    | 302                                         | 500         | 0.5                                     | 10               |
| 3D SnS flowers               | 360                                         | 50          | 0.8                                     | 11               |
| SnS-PNA                      | 900                                         | 50          | 0.3                                     | 12               |
| C@SnS/SnO <sub>2</sub> @CNFs | 917                                         | 200         | 0.2                                     | 13               |
| <b>N-DCSNs</b>               | <b>911.5</b>                                | <b>270</b>  | <b>0.2</b>                              | <b>This work</b> |
|                              | <b>511.3</b>                                | <b>1000</b> | <b>1.0</b>                              |                  |

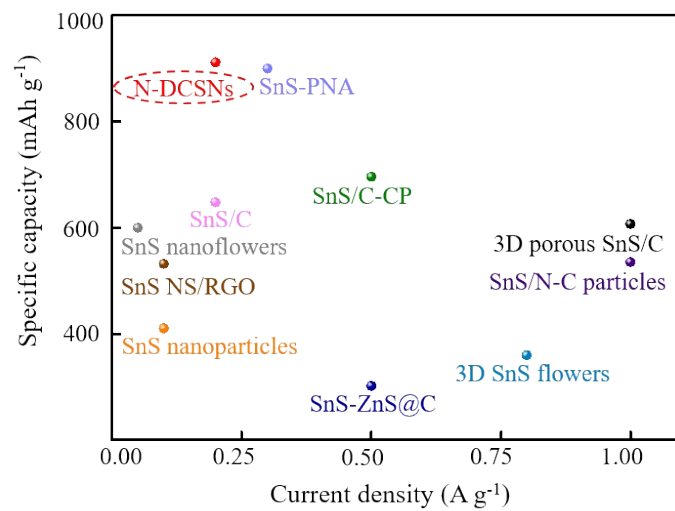

**Figure S8.** Electrochemical performance of SnS-based anode materials for LIBs.

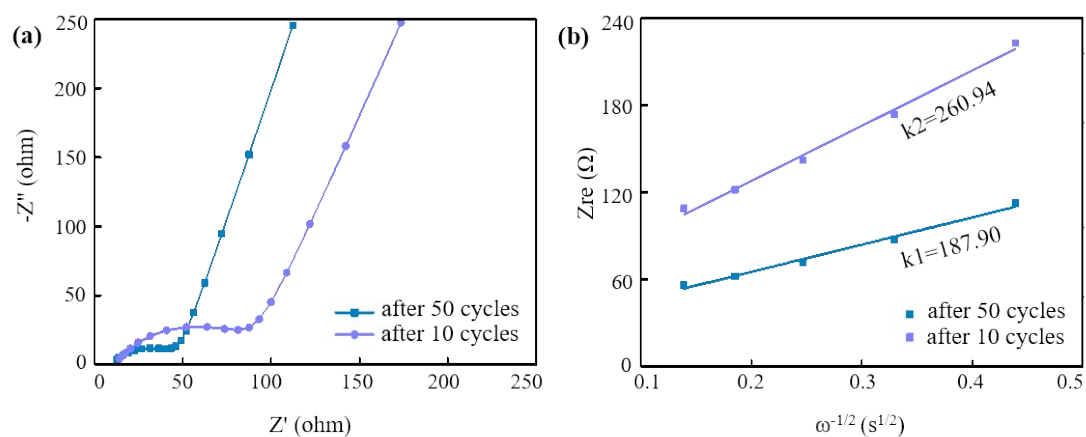

**Figure S9.** (a) Nyquist plots of N-DCSNs electrodes measured in the frequency region of  $10^5$ - $10^{-2}$  Hz after 10 and 50 cycles. (b) The real part of the complex impedance versus  $\omega^{-1/2}$  at open circuit voltage for N-DCSNs electrodes after 10 and 50 cycles.

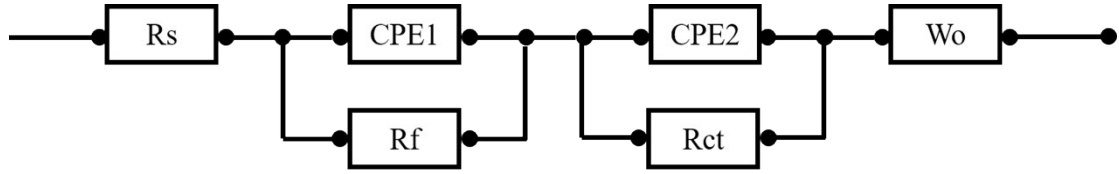

**Figure S10.** Equivalent circuit model for the simulation of the Nyquist plots.

$R_s$  is the electrolyte resistance,  $R_f$  is surface film resistance,  $R_{ct}$  is charge transfer resistance,  $W_o$  is the Warburg impedance related to the diffusion of Li-ion into electrodes,  $CPE1$  and  $CPE2$  represent the constant phase elements.

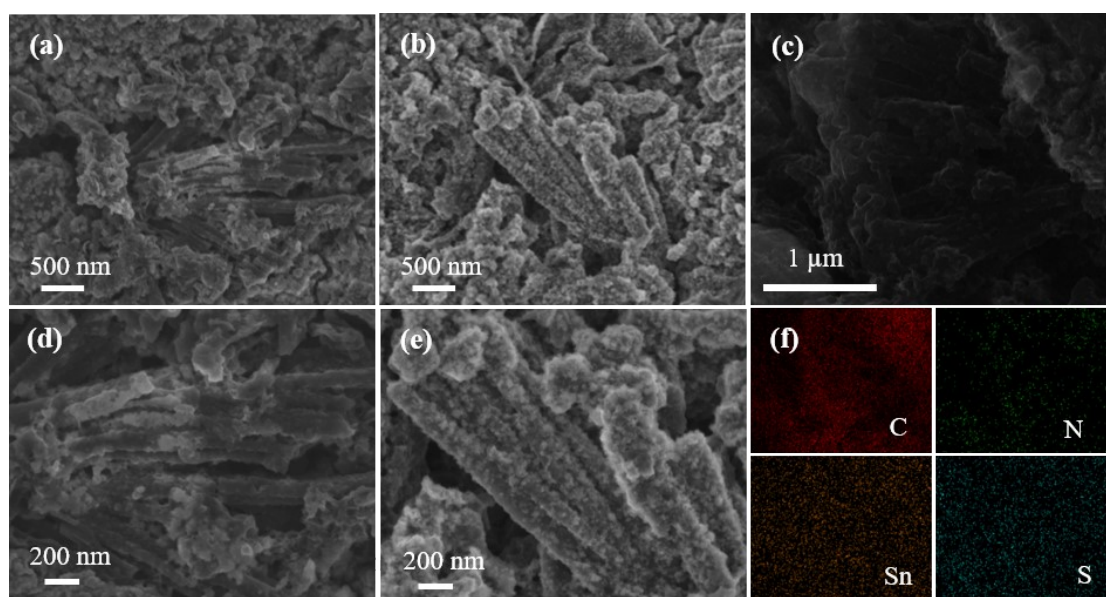

**Figure S11.** SEM images of N-DCSNs electrodes after 60 cycles (a, d) and 270 cycles (b, e) at  $0.2 \text{ A g}^{-1}$ . (e, f) EDS images with the corresponding element distribution images of N-DCSNs.

**Table S2.** Impedance parameters of N-DCSNs, CN/SnS and SnS electrodes before cycling obtained by the equivalent circuit model.

| Samples | $R_s (\Omega)$ | $R_f (\Omega)$ | $R_{ct} (\Omega)$ |
|---------|----------------|----------------|-------------------|
| N-DCSNs | 1.928          | 48.98          | 36.68             |
| CN/SnS  | 2.905          | 51.2           | 57.19             |
| SnS     | 2.104          | 72.06          | 61.77             |

**Table S3.** The linear relevant fitting result of the N-DCSNs, CN/SnS and bare SnS electrodes, respectively.

| Slope           | N-DCSNs | CN/SnS | SnS    |
|-----------------|---------|--------|--------|
| Before cycle    | 105.57  | 116.08 | 75.99  |
| After 50 cycles | 187.90  | 372.11 | 313.28 |

**Depiction S1.** Electric conductivity & Li-ion diffusion coefficient at open circuit state:<sup>14-17</sup>

$$D = R^2 T^2 / 2 A^2 n^4 F^4 C^2 \sigma^2 \dots (1) \quad Z_{Re} = R_e + R_{ct} + \sigma \omega^{-1/2} \dots (2)$$

where  $D$  is the diffusion coefficient ( $\text{cm}^2 \text{s}^{-1}$ ),  $R$  is the gas constant ( $8.31 \text{ J mol}^{-1} \text{ K}^{-1}$ ),  $T$  is the absolute temperature (298 K),  $A$  is the surface area of the anode ( $0.36 \text{ cm}^2$ ),  $n$  is the number of electrons transferred in the half-reaction for the redox couple,  $F$  is the Faraday constant ( $96485 \text{ C mol}^{-1}$ ),  $C$  is the molar concentration of Li-ion in N-DCSNs,  $R_e$  is the resistance between the electrolyte and electrode,  $R_{ct}$  is the charge transfer resistance,  $\omega$  is frequency, and  $\sigma$  is the Warburg factor which corresponds to the slope of the curve shown in **Figure 5c, d**.



**Depiction S2.** The chemical diffusion coefficients of the electrodes in LIBs are determined by formulas 3 and 4:<sup>18</sup>

$$D = \frac{4}{\pi} \left( \frac{I_0 V_M}{S F z_i} \right)^2 \left[ \frac{dE}{d\delta} / \frac{dE}{d\sqrt{\tau}} \right]^2 \left( \tau \ll \frac{L^2}{D} \right) \quad (3) \quad D = \frac{4}{\pi \tau} \left( \frac{m_B V_M}{S M_B} \right)^2 \left( \frac{\Delta E_s}{\Delta E_\tau} \right)^2 \left( \tau \ll \frac{L^2}{D} \right) \quad (4)$$

The parameters required for D value can be obtained from the known conditions according to formula 4,  $\tau$  is the excitation current time (s),  $S$  is the electrode area ( $\text{cm}^2$ ),  $\Delta E_s$  is the steady-state voltage change (V),  $\Delta E_\tau$  is the transient voltage change (V),  $V_M$  is the molar volume of electrode material ( $\text{cm}^3 \text{mol}^{-1}$ ),  $m_B$  is the mass of the electrode material (g), and  $M_B$  is the molar mass of the electrode material ( $\text{g mol}^{-1}$ ).

## References:

1. Yao, L.; Nie, M.; Zhu, C.; Cai, R.; Xia, W.; Sun, L.; Xu, F., Revealing a conversion-alloying reaction mechanism behind high capacity and rate capability of SnS/N-doped graphene anode by in situ TEM. *Electrochim. Acta.* **2019**, *297*, 46-54.
2. Guo, W.; Ding, K.; Mei, S.; Li, X.; Feng, X.; Guo, S.; Fu, J.; Zhang, X.; Gao, B.; Huo, K.; Chu, P. K., Hollow spheres consisting of SnS nanosheets conformally coated with S-doped carbon for advanced lithium/sodium-ion battery anodes. *ChemElectroChem* **2020**, *7* (4), 914-921.
3. Jin, A.; Kang, N.; Um, J. H.; Ko, I. H.; Kim, M. S.; Kim, K.; Kim, S. H.; Yu, S. H.; Sung, Y. E., Sn(salen)-derived SnS nanoparticles embedded in N-doped carbon for high performance lithium-ion battery anodes. *Chem. Commun.* **2020**, *56* (58), 8095-8098.
4. Xia, J.; Liu, L.; Jamil, S.; Xie, J.; Yan, H.; Yuan, Y.; Zhang, Y.; Nie, S.; Pan, J.; Wang, X.; Cao, G., Free-standing SnS/C nanofiber anodes for ultralong cycle-life lithium-ion batteries and sodium-ion batteries. *Energy Stor. Mater.* **2019**, *17*, 1-11.
5. Zhu, C.; Kopold, P.; Li, W.; van Aken, P. A.; Maier, J.; Yu, Y., A general strategy to fabricate carbon-coated 3D porous interconnected metal sulfides: case study of SnS/C nanocomposite for high-performance lithium and sodium ion batteries. *Adv. Sci.* **2015**, *2* (12), 1500200.
6. Manukumar, K. N.; Nagaraju, G.; Kishore, B.; Madhu, C.; Munichandraiah, N., Ionic liquid-assisted hydrothermal synthesis of SnS nanoparticles: Electrode materials for lithium batteries, photoluminescence and photocatalytic activities. *J. Energy Chem.* **2018**, *27* (3), 806-812.
7. Vaughn, D. D.; Hentz, O. D.; Chen, S.; Wang, D.; Schaak, R. E., Formation of SnS nanoflowers for lithium ion batteries. *Chem. Commun.* **2012**, *48* (45), 5608-5610.
8. Zheng, J.; Luo, Y.; Xie, D.; Xiong, X.; Lin, Z.; Wang, G.; Yang, C.; Liu, M., One-pot synthesis of SnS/C nanocomposites on carbon paper as a high-performance free-standing anode for lithium ion batteries. *J. Alloys Compd.* **2019**, *779*, 67-73.
9. Li, S.; Zheng, J.; Zuo, S.; Wu, Z.; Yan, P.; Pan, F., 2D hybrid anode based on SnS

nanosheet bonded with graphene to enhance electrochemical performance for lithium-ion batteries. *RSC Adv.* **2015**, *5* (58), 46941-46946.

10. Zhang, Y.; Wang, P.; Yin, Y.; Zhang, X.; Fan, L.; Zhang, N.; Sun, K., Heterostructured SnS-ZnS@C hollow nanoboxes embedded in graphene for high performance lithium and sodium ion batteries. *Chem. Eng. J.* **2019**, *356*, 1042-1051.

11. Cho, E.; Song, K.; Park, M. H.; Nam, K. W.; Kang, Y. M., SnS 3D flowers with superb kinetic properties for anodic use in next-generation sodium rechargeable batteries. *Small* **2016**, *12* (18), 2510-2517.

12. Choi, J.; Kim, N. R.; Lim, K.; Ku, K.; Yoon, H. J.; Kang, J. G.; Kang, K.; Braun, P. V.; Jin, H. J.; Yun, Y. S., Tin Sulfide-Based Nanohybrid for High-Performance Anode of Sodium-Ion Batteries. *Small* **2017**, *13* (30), 1700767.

13. Lian, Q.; Zhou, G.; Zeng, X.; Wu, C.; Wei, Y.; Cui, C.; Wei, W.; Chen, L.; Li, C., Carbon coated SnS/SnO<sub>2</sub> heterostructures wrapping on CNFs as an improved-performance anode for Li-ion batteries: lithiation-induced structural optimization upon cycling. *ACS Appl. Mater. Interfaces* **2016**, *8* (44), 30256-30263.

14. Yin, H.; Shen, W.; Qu, H.-Q.; Li, C.; Zhu, M.-Q., Boosted charge transfer and Na-ion diffusion in cooling-fins-like Sb<sub>2</sub>Te-Te nano-heterostructure for long cycle life and high rate capability anode. *Nano Energy* **2020**, *70*, 104468.

15. Jae-Min; Jeong, Ultrathin sandwich-like MoS<sub>2</sub>@N-doped carbon nanosheets for anodes of lithium ion batteries. *Nanoscale* **2015**, *1* (7), 324-329.

16. Ai, W.; Huang, Z.; Wu, L.; Du, Z.; Zou, C.; He, Z.; Shahbazian-Yassar, R.; Huang, W.; Yu, T., High-rate, long cycle-life Li-ion battery anodes enabled by ultrasmall tin-based nanoparticles encapsulation. *Energy Stor. Mater.* **2018**, *14*, 169-178.

17. Yin, H.; Yu, X.-X.; Zhao, H.; Li, C.; Zhu, M.-Q., Towards high-performance cathode materials for lithium-ion batteries: Al<sub>2</sub>O<sub>3</sub>-coated LiNi<sub>0.8</sub>Co<sub>0.15</sub>Zn<sub>0.05</sub>O<sub>2</sub>. *J. Solid. State. Electr.* **2018**, *22* (8), 2395-2403.

18. Zhu, S.; Yin, H.; Wang, Y.; Hui, K. S.; Wu, X.-L.; Mai, W.; Hong, X.; Chen, F.; Hui, K. N., Heteroatomic interface engineering of MOF-derived metal-embedded P and N-codoped Zn node porous polyhedral carbon with enhanced sodium-ion storage. *ACS Appl. Energy Mater.* **2020**, *3* (9), 8892-8902.
